# Supplementary material for: Legionella longbeachae Regulates the Association of Polyubiquitinated Proteins on Bacterial Phagosome with Multiple Deubiquitinases
Source: PubMed Central journal article supplement (PMC10100730; doi:10.1128/spectrum.04179-22), 2023-02-15
Supplement: spectrum.04179-22-s0001.pdf [file spectrum.04179-22-s0001.pdf]

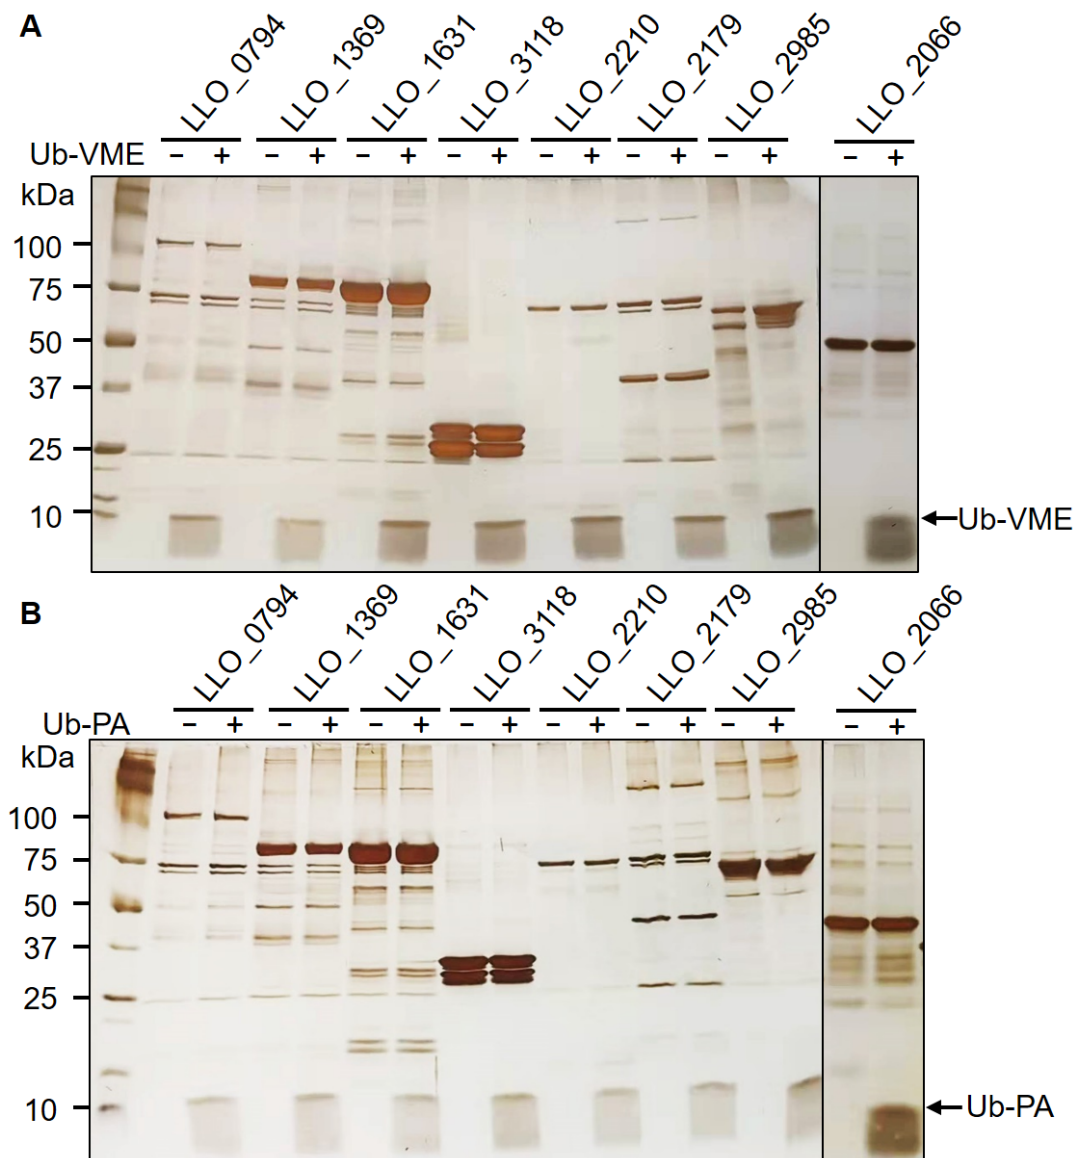

**FIG S1. Reactivity of the candidate proteins with the suicide probes.**

Recombinant proteins purified from *E. coli* were reacted with Ub-VME (A) or Ub-PA (B) at 37 °C for 2 h. Proteins separated by SDS-PAGE were subjected to silver staining. Similar results are observed in three independent experiments.

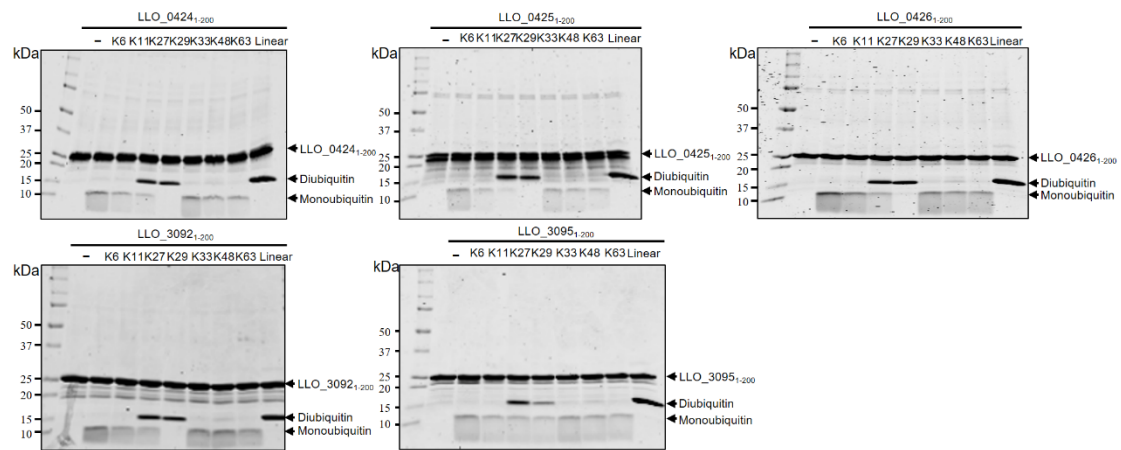

**FIG S2. Hydrolysis of diubiquitins by the DUB modules of the *L. longbeachae* SidE family proteins.** The DUB domains of SidE orthologue proteins in *L. longbeachae* were purified and incubated with a panel of diubiquitins at 37 °C for 2 h. Cleavage of diubiquitins were visualized after SDS-PAGE followed by Coomassie brilliant blue staining (CBB). Data shown are one representative from three independent experiments.

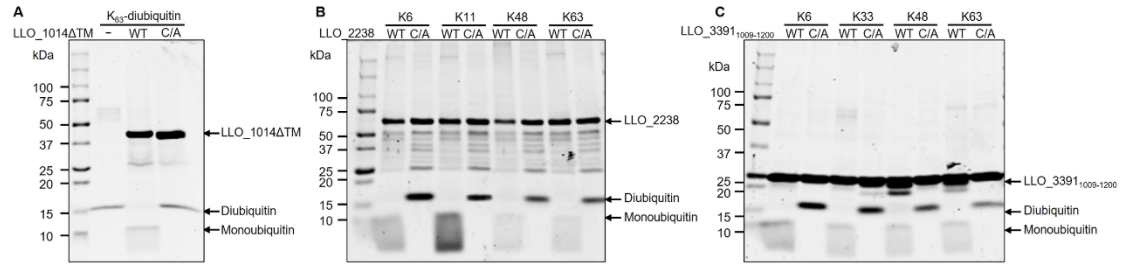

**FIG S3. Cleavage of diubiquitins requires the catalytic cysteine in DUBs.**

The indicated diubiquitins were incubated with WT or their active cysteine mutant DUBs at 37 °C for 1 h. Proteins in the reactions were separated by SDS-PAGE and detected by CBB. Data shown are one representative from three independent experiments.

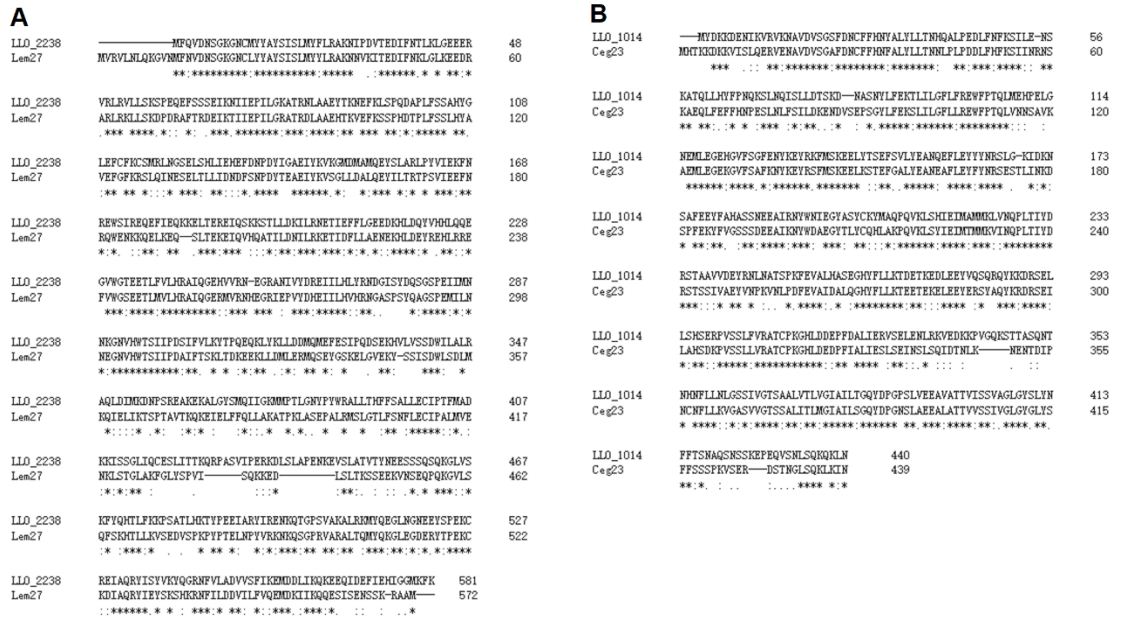

**FIG S4. Sequence alignments of *L. longbeachae* OTU proteins and their orthologs in *L. pneumophila*.** The alignments are generated via Clustal Omega (<https://www.ebi.ac.uk/Tools/msa/clustalo/>) using LLO\_2238/Lem27 (A) or LLO\_1014/Ceg23 (B) as queries.

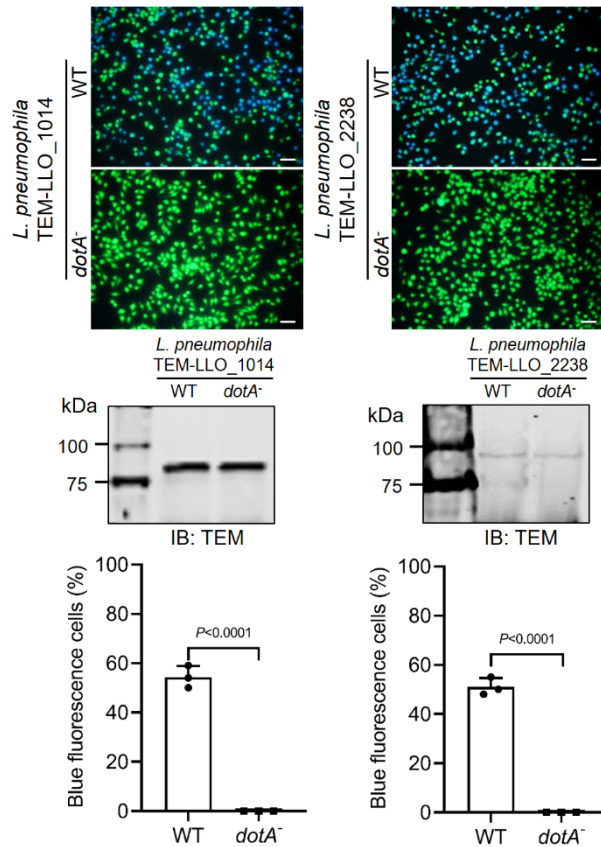

**FIG S5. Translocation of *L. longbeachae* OTUs by the *L. pneumophila* Dot/Icm system.** Plasmids expressing the indicated TEM fusion proteins were electroporated into both wild-type *L. pneumophila* and *dotA*<sup>-</sup> mutant. These strains were used to infect RAW264.7 cells for 2 h at an MOI of 50. After loading the samples with CCF4/AM, translocation of the TEM-fused OTUs were visualized by the Olympus IX83 fluorescence microscope equipped with a  $\beta$ -lactamase FL-Cube. Scale bar: 100  $\mu$ m. Expression of the TEM fusion proteins in *L. pneumophila* strains were confirmed by probing the bacterial cells with a TEM antibody. Three randomly selected images were used to count the cells emitting blue fluorescence signals (n = 500). Data are one representative of three independent experiments.

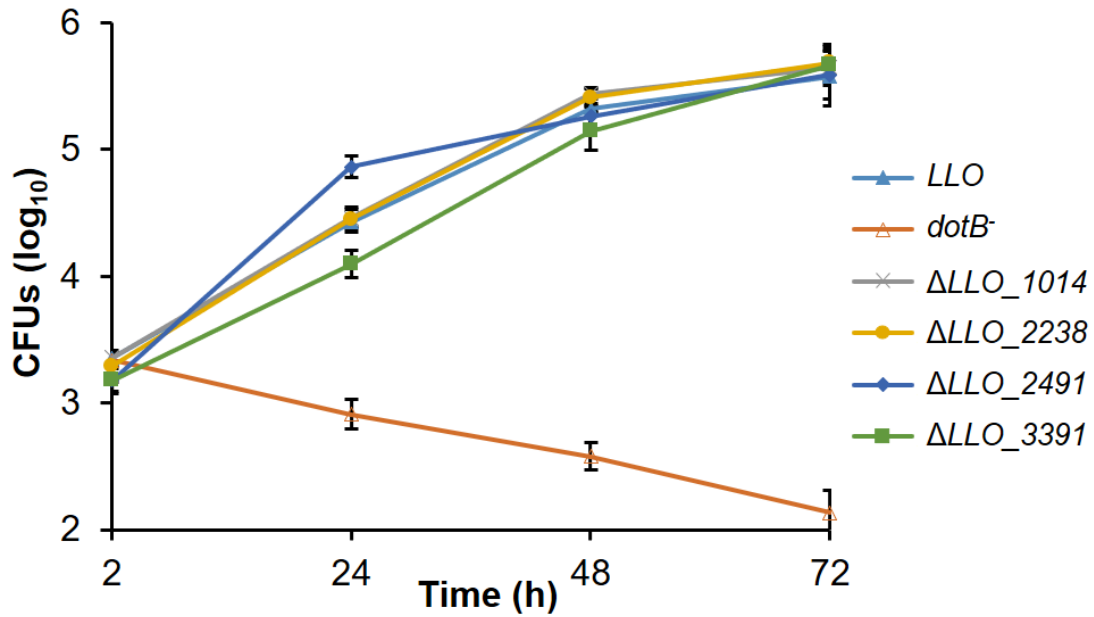

**FIG S6. *L. longbeachae* DUBs are not required for bacterial intracellular replication.** U937 cells were challenged with wild-type,  $\Delta dotB$ ,  $\Delta LLO_{1014}$ ,  $\Delta LLO_{2238}$ ,  $\Delta LLO_{2491}$ , and  $\Delta LLO_{3391}$  at an MOI of 10. At indicated time after infection, infected cells were lysed and plated on CYE plates. The CFUs were counted after culturing at 37 °C for 4 days. Results are presented as mean  $\pm$  SD and are one representative from three independent assays done in triplicate.

**Table S1. Bacterial strains used in the study.**

| Bacterial Strains                 | Relevant properties                                                                                         | Reference      |
|-----------------------------------|-------------------------------------------------------------------------------------------------------------|----------------|
| <i>E. coli</i>                    |                                                                                                             |                |
| DH5α(λpir)                        | supE44 <i>dlacU169</i> (φ80 <i>lacZ</i> ΔM15) <i>hsdR17 recA1 endA1 gyrA96 thi-1 relA1 pir tet::Mu recA</i> | Our collection |
| BL21(DE3)                         | F <sup>-</sup> <i>ompT hsdSB</i> (rB <sup>-</sup> mB <sup>-</sup> ) <i>gal dcm</i> (DE3)                    | Our collection |
| <i>L. longbeachae</i>             |                                                                                                             |                |
| <i>L. longbeachae</i> serogroup 1 | ATCC <sup>a</sup> 33462; type strain                                                                        | ATCC 33462     |
| YS0001                            | ATCC 33462 <i>L. longbeachae</i> serogroup 1 strain with <i>dotB</i> deletion mutation                      | This study     |
| YS0002                            | LLO+pXDC61JQ-Flag                                                                                           | This study     |
| YS0003                            | LLO <i>dotB</i> +pXDC61JQ-Flag                                                                              | This study     |
| YS0004                            | LLO Δ <i>LLO_1014</i>                                                                                       | This study     |
| YS0005                            | LLO Δ <i>LLO_1014</i> +pXDC61JQ-Flag                                                                        | This study     |
| YS0006                            | LLO Δ <i>LLO_1014</i> +pXDC61JQ-Flag-LLO_1014                                                               | This study     |
| YS0007                            | LLO Δ <i>LLO_1014</i> +pXDC61JQ-Flag-LLO_1014 <sub>C26A</sub>                                               | This study     |
| YS0008                            | LLO Δ <i>LLO_2238</i>                                                                                       | This study     |
| YS0009                            | LLO Δ <i>LLO_2238</i> +pXDC61JQ-Flag                                                                        | This study     |
| YS0010                            | LLO Δ <i>LLO_2238</i> +pXDC61JQ-Flag-LLO_2238                                                               | This study     |
| YS0011                            | LLO Δ <i>LLO_2238</i> +pXDC61JQ-Flag-LLO_2238 <sub>C12A</sub>                                               | This study     |
| YS0012                            | LLO Δ <i>LLO_2491</i>                                                                                       | This study     |
| YS0013                            | LLO Δ <i>LLO_3391</i>                                                                                       | This study     |
| YS0014                            | LLO+pXDC61JQ-Flag-LLO_1014                                                                                  | This study     |
| YS0015                            | LLO <i>dotB</i> +pXDC61JQ-Flag-LLO_1014                                                                     | This study     |
| YS0016                            | LLO+pXDC61JQ-Flag-LLO_2238                                                                                  | This study     |
| YS0017                            | LLO <i>dotB</i> +pXDC61JQ-Flag-LLO_2238                                                                     | This study     |
| <i>L. pneumophila</i>             |                                                                                                             |                |
| Lp02                              | Philadelphia-1 <i>rpsL hsdR thyA</i>                                                                        | (1)            |
| Lp03                              | Lp02 <i>dotA</i> <sup>-</sup>                                                                               | (1)            |
| Lp02 (pZL507)                     | Lp02+pZL507                                                                                                 | (2)            |
| Lp03 (pZL507)                     | Lp03+pZL507                                                                                                 | (2)            |
| YS0018                            | LP02 Δ <i>ceg23</i>                                                                                         | (3)            |
| YS0019                            | LP02 Δ <i>ceg23</i> +pZL507                                                                                 | (3)            |
| YS0020                            | LP02 Δ <i>ceg23</i> +pZL507-Ceg23                                                                           | (3)            |
| YS0021                            | LP02 Δ <i>ceg23</i> +pZL507-LLO_1014                                                                        | This study     |
| YS0022                            | LP02 Δ <i>ceg23</i> +pZL507-LLO_1014 <sub>C26A</sub>                                                        | This study     |
| YS0023                            | LP02 Δ <i>lem27</i>                                                                                         | (4)            |

|        |                                                      |            |
|--------|------------------------------------------------------|------------|
| YS0024 | LP02 $\Delta lem27$ +pZL507                          | (4)        |
| YS0025 | LP02 $\Delta lem27$ +pZL507-Lem27                    | (4)        |
| YS0026 | LP02 $\Delta lem27$ +pZL507-LLO_2238                 | This study |
| YS0027 | LP02 $\Delta lem27$ +pZL507-LLO_2238 <sub>C12A</sub> | This study |
| YS0028 | LP02 TEM-LLO_1014                                    | This study |
| YS0029 | Lp03 <i>dotA</i> <sup>-</sup> TEM-LLO_1014           | This study |
| YS0030 | LP02 TEM-LLO_2238                                    | This study |
| YS0031 | Lp03 <i>dotA</i> <sup>-</sup> TEM-LLO_2238           | This study |

---

<sup>a</sup> ATCC, American Type Culture Collection



**Table S2. Plasmids used in the study.**

| Plasmids                                            | Properties                                                                           | Reference           |
|-----------------------------------------------------|--------------------------------------------------------------------------------------|---------------------|
| pET28a                                              | Kan <sup>R</sup> , <i>E. Coli</i> expression vectors for His-tagged proteins         | Novagen (CAT#69864) |
| pET28a- <i>LLO_0424</i> <sub>1-200</sub>            | <i>LLO_0424</i> <sub>1-200</sub> ( <i>LLO_0424</i> residues 1-200) in pET28a         | This study          |
| pET28a- <i>LLO_0425</i> <sub>1-200</sub>            | <i>LLO_0425</i> <sub>1-200</sub> ( <i>LLO_0425</i> residues 1-200) in pET28a         | This study          |
| pET28a- <i>LLO_0426</i> <sub>1-200</sub>            | <i>LLO_0426</i> <sub>1-200</sub> ( <i>LLO_0426</i> residues 1-200) in pET28a         | This study          |
| pET28a- <i>LLO_3092</i> <sub>1-200</sub>            | <i>LLO_3092</i> <sub>1-200</sub> ( <i>LLO_3092</i> residues 1-200) in pET28a         | This study          |
| pET28a- <i>LLO_3095</i> <sub>1-200</sub>            | <i>LLO_3095</i> <sub>1-200</sub> ( <i>LLO_3095</i> residues 1-200) in pET28a         | This study          |
| pET28a- <i>LLO_1014</i> $\Delta$ TM                 | <i>LLO_1014</i> $\Delta$ TM ( <i>LLO_1014</i> residues 1-358) in pET28a              | This study          |
| pET28a- <i>LLO_1014</i> $\Delta$ TM <sub>C26A</sub> | pET28a- <i>LLO_1014</i> $\Delta$ TM with mutation C26A                               | This study          |
| pET28a- <i>LLO_2238</i>                             | Full length <i>LLO_2238</i> in pET28a                                                | This study          |
| pET28a- <i>LLO_2238</i> <sub>C12A</sub>             | pET28a- <i>LLO_2238</i> with mutation C12A                                           | This study          |
| pET28a- <i>LLO_2491</i> $\Delta$ C102               | <i>LLO_2491</i> $\Delta$ C102 ( <i>LLO_2491</i> residues 1-270) in pET28a            | This study          |
| pET28a- <i>LLO_3391</i> <sub>1009-1200</sub>        | <i>LLO_3391</i> <sub>1009-1200</sub> ( <i>LLO_3391</i> residues 1009-1200) in pET28a | This study          |
| pET28a- <i>LLO_3391</i> <sub>1009-1200</sub> C1124A | pET28a- <i>LLO_3391</i> <sub>1009-1200</sub> with mutation C1124A                    | This study          |
| pET28a- <i>LLO_0794</i>                             | Full length <i>LLO_0794</i> in pET28a                                                | This study          |
| pET28a- <i>LLO_1369</i>                             | Full length <i>LLO_1369</i> in pET28a                                                | This study          |
| pET28a- <i>LLO_1631</i>                             | Full length <i>LLO_1631</i> in pET28a                                                | This study          |
| pET28a- <i>LLO_3118</i>                             | Full length <i>LLO_3118</i> in pET28a                                                | This study          |
| pET28a- <i>LLO_2210</i>                             | Full length <i>LLO_2210</i> in pET28a                                                | This study          |
| pET28a- <i>LLO_2179</i>                             | Full length <i>LLO_2179</i> in pET28a                                                | This study          |
| pET28a- <i>LLO_2985</i>                             | Full length <i>LLO_2985</i> in pET28a                                                | This study          |
| pET28a- <i>LLO_2066</i>                             | Full length <i>LLO_2066</i> in pET28a                                                | This study          |
| pSR47s                                              | R6K suicide vector (Kan <sup>R</sup> , sacB)                                         | (5)                 |
| pSR47s- $\Delta$ <i>LLO_1014</i>                    | pSR47s containing the flanking region of <i>LLO_1014</i>                             | This study          |
| pSR47s- $\Delta$ <i>LLO_2238</i>                    | pSR47s containing the flanking region of <i>LLO_2238</i>                             | This study          |
| pSR47s- $\Delta$ <i>LLO_2491</i>                    | pSR47s containing the flanking region of <i>LLO_2491</i>                             | This study          |
| pSR47s- $\Delta$ <i>LLO_3391</i>                    | pSR47s containing the flanking region of <i>LLO_3391</i>                             | This study          |

|                                        |                                                                                                              |            |
|----------------------------------------|--------------------------------------------------------------------------------------------------------------|------------|
| pSR47s- $\Delta$ LLO_2066              | pSR47s containing the flanking region of LLO_2066                                                            | This study |
| peGFPC1                                | For expressing N-terminal GFP fusion proteins in mammalian cells                                             | Clontech   |
| peGFP- <i>sdeA<sub>Dub</sub></i>       | <i>sdeA<sub>Dub</sub></i> (residues 1-200) in peGFPC1                                                        | (6)        |
| peGFP-LLO_1014                         | LLO_1014 in peGFPC1                                                                                          | This study |
| peGFP-LLO_1014 <sub>C26A</sub>         | LLO_1014 <sub>C26A</sub> in peGFPC1                                                                          | This study |
| peGFP-LLO_2238                         | LLO_2238 in peGFPC1                                                                                          | This study |
| peGFP-LLO_2491                         | LLO_2491 in peGFPC1                                                                                          | This study |
| peGFP-LLO_3391 <sub>1009-1200</sub>    | LLO_3391 <sub>1009-1200</sub> in peGFPC1                                                                     | This study |
| peGFP-LLO_2066                         | LLO_2066 in peGFPC1                                                                                          | This study |
| pZL507                                 | For expression His <sub>6</sub> -tagged protein <i>L. pneumophila</i>                                        | (7)        |
| pZL507-4xFlag-LLO_1014                 | 4xFlag- LLO_1014 in pZL507                                                                                   | This study |
| pZL507-4xFlag-LLO_1014 <sub>C26A</sub> | 4xFlag- LLO_1014 <sub>C26A</sub> in pZL507                                                                   | This study |
| pZL507-4xFlag-LLO_2238                 | 4xFlag- LLO_2238 in pZL507                                                                                   | This study |
| pZL507-4xFlag-LLO_2238 <sub>C12A</sub> | 4xFlag-LLO_2238 <sub>C12A</sub> in pZL507                                                                    | This study |
| p3xHACDNA3.1- <i>ub</i>                | Ubiquitin in p3xHACDNA3.1                                                                                    | (6)        |
| p3xHACDNA3.1- <i>ub-63K</i>            | Ub63K in p3xHACDNA3.1                                                                                        | (4)        |
| pXDC61m                                | Encodes IPTG-inducible with N-terminal BlaM fusion; Cm <sup>R</sup>                                          | (8)        |
| pXDC61m-LLO_1014                       | LLO_1014 in pXDC61m                                                                                          | This study |
| pXDC61m-LLO_2238                       | LLO_2238 in pXDC61m                                                                                          | This study |
| pXDC61JQ                               | Encodes IPTG-inducible expressing N-terminal Flag fusion proteins in <i>L. Longbeachae</i> ; Cm <sup>R</sup> | This study |
| pXDC61JQ-LLO_1014                      | LLO_1014 in pXDC61JQ                                                                                         | This study |
| pXDC61JQ-LLO_2238                      | LLO_2238 in pXDC61JQ                                                                                         | This study |

---

**Table S3. Primers used in the study.**

| Primers | Sequence <sup>a</sup>                         | Note                                          |
|---------|-----------------------------------------------|-----------------------------------------------|
| pYS1001 | CTGGGATCCATGTACGATAAAAAAGATG                  | <i>LLO_1014</i> 5F BamHI                      |
| pYS1002 | CTGGTTCGACTTAATTCAACTTTTGT                    | <i>LLO_1014</i> 3R Sall                       |
| pYS1003 | CTGGTTCGACTCAAAGGAAGTTATGATTTG                | <i>LLO_1014ΔTM</i> 3R Sall                    |
| pYS1004 | CTGGGATCCATGTTTCAAGTGGATAATAG                 | <i>LLO_2238</i> 5F BamHI                      |
| pYS1005 | CTGGTTCGACTTACTTGAATTCATTCC                   | <i>LLO_2238</i> 3R Sall                       |
| pYS1006 | CTGGGATCCATGCCTTTTAGAATAGAT                   | <i>LLO_2491</i> 5F BamHI                      |
| pYS1007 | CTGGTTCGACTTAGTAGCTTAAAATTCG                  | <i>LLO_2491</i> 3R Sall                       |
| pYS1008 | CTGGTTCGACTCAAGAAATTTCCCGGGGT                 | <i>LLO_2491ΔC102</i> 3R Sall                  |
| pYS1009 | CTGGGATCCATGAAAAGCATTACAGAG                   | <i>LLO_2066</i> 5F BamHI                      |
| pYS1010 | CTGGTTCGACTTACCCGAGTGTGAAGA                   | <i>LLO_2066</i> 3R Sall                       |
| pYS1011 | CTGGGATCCATGCCTGAATACATAAAAG                  | <i>LLO_0424</i> <sub>1-200</sub> 5F BamHI     |
| pYS1012 | CTGGTTCGACTTATATTTCTTTTAGAACAGT               | <i>LLO_0424</i> <sub>1-200</sub> 3R Sall      |
| pYS1013 | CTGAGATCTATGCCTAAGTATGTAAAAG                  | <i>LLO_0425</i> <sub>1-200</sub> 5F BglII     |
| pYS1014 | CTGGTTCGACTTACGGAAGTACTCTGAGATG               | <i>LLO_0425</i> <sub>1-200</sub> 3R Sall      |
| pYS1015 | CTGGGATCCATGCCTAAATACGATAAAAG                 | <i>LLO_0426</i> <sub>1-200</sub> 5F BamHI     |
| pYS1016 | CTGGTTCGACTTAAGGGATTTCTATATGTAA               | <i>LLO_0426</i> <sub>1-200</sub> 3R Sall      |
| pYS1017 | CTGGGATCCATGCCAAAATACATAAAAG                  | <i>LLO_3092</i> <sub>1-200</sub> 5F BamHI     |
| pYS1018 | CTGGTTCGACTTAAGTTGGAGTTTCTATATG               | <i>LLO_3092</i> <sub>1-200</sub> 3R Sall      |
| pYS1019 | CTGAGATCTATGCCCGAGTTTGTGCAAG                  | <i>LLO_3095</i> <sub>1-200</sub> 5F BglII     |
| pYS1020 | CTGGTTCGACTTATGCGGGTATGTGTATGTT               | <i>LLO_3095</i> <sub>1-200</sub> 3R Sall      |
| pYS1021 | CTGGGATCCATGTTATACGTAGAAGAAATG                | <i>LLO_3391</i> <sub>1009-1200</sub> 5F BamHI |
| pYS1022 | CTGGTTCGACTCATTCACTTTCTTGCCTTA                | <i>LLO_3391</i> <sub>1009-1200</sub> 3R Sall  |
| pYS1023 | CTGGGATCCATGATTCCAGTAGAAATAG                  | <i>LLO_1631</i> 5F BamHI                      |
| pYS1024 | CTGGTTCGACTTAAGAAACGGAGCCCAT                  | <i>LLO_1631</i> 3R Sall                       |
| pYS1025 | CTGGGATCCATGCGACTAGAGATATCAA                  | <i>LLO_3118</i> 5F BamHI                      |
| pYS1026 | CTGGTTCGACTTATCGATTATGCTTTAT                  | <i>LLO_3118</i> 3R Sall                       |
| pYS1027 | CTGGAGCTCATGAAAGATGATAAGTCAG                  | <i>LLO_2179</i> 5F SacI                       |
| pYS1028 | CTGGCGGCCGCTTAAACTTTAAATTGGCT                 | <i>LLO_2179</i> 3R NotI                       |
| pYS1029 | CTGGGATCCATGCAAAACTCATGGAAAG                  | <i>LLO_0794</i> 5F BamHI                      |
| pYS1030 | CTGGTTCGACTCATTCTCTGCACTAAT                   | <i>LLO_0794</i> 3R Sall                       |
| pYS1031 | CTGGCGGCCGCATGAGAGATGATAAGTTAG                | <i>LLO_2985</i> 5F NotI                       |
| pYS1032 | CTGCTCGAGCTAAAAGTTAAATTGTCT                   | <i>LLO_2985</i> 3R XhoI                       |
| pYS1033 | CTGGGATCCATGTTTACCGAAGAATTCA                  | <i>LLO_1369</i> 5F BamHI                      |
| pYS1034 | CTGGTTCGACTTAGACACTTGTAACGTT                  | <i>LLO_1369</i> 3R Sall                       |
| pYS1035 | CTGGCGGCCGCATGACTCTACCAATATTT                 | <i>LLO_2210</i> 5F NotI                       |
| pYS1036 | CTGGTTCGACTCATTCAAATGAATCCC                   | <i>LLO_2210</i> 3R Sall                       |
| pYS1107 | CTGGTTCGACTACCAAGCTGGTAAGA                    | <i>LLO dotB</i> knockout up Sall-F            |
| pYS1108 | ATTAATTTATATACTCGAGTAAAACGAGTAGGCTC<br>ATCAGG | <i>LLO dotB</i> knockout up-R                 |
| pYS1109 | CCTGATGAGCCTACTCGTTTTACTCGAGTATATAA<br>ATTAAT | <i>LLO dotB</i> knockout down-F               |
| pYS1110 | CTGGGATCCGGTAAGGGGGATGAAT                     | <i>LLO dotB</i> knockout down                 |

|         |                                                                    |                                               |
|---------|--------------------------------------------------------------------|-----------------------------------------------|
| pYS1037 | ACGCG <u>TCGACA</u> ACCCGCTCATTATGTTACC                            | BamHI-R<br><i>LLO_1014</i> knockout up Sall-F |
| pYS1038 | AAATTGGATACTTGTTCTGGATTTTTACTCGAAC<br>TTTAA                        | <i>LLO_1014</i> knockout up-R                 |
| pYS1039 | TTAAAGTTCGAGTAAAAAATCCAGAACAAGTATC<br>CAATTT                       | <i>LLO_1014</i> knockout down-F               |
| pYS1040 | CGC <u>GGATCCT</u> AATCGATTTTTTTAGCAGG                             | <i>LLO_1014</i> knockout down<br>BamHI-R      |
| pYS1041 | ACGCG <u>TCGACA</u> CTCACAATGTTTTCTATT                             | <i>LLO_2238</i> knockout up Sall-F            |
| pYS1042 | TGCTCAATAAACTCATCAATATAATACATACAATTG<br>CCTT                       | <i>LLO_2238</i> knockout up-R                 |
| pYS1043 | AAGGCAATTGTATGTATTATATTGATGAGTTTATTG<br>AGCA                       | <i>LLO_2238</i> knockout down-F               |
| pYS1044 | CGC <u>GGATCCA</u> AAATTTATCATTTGTAGGAA                            | <i>LLO_2238</i> knockout down<br>BamHI-R      |
| pYS1045 | ACGCG <u>TCGACT</u> TTAGAAGATGATACTGGTG                            | <i>LLO_2491</i> knockout up Sall-F            |
| pYS1046 | TCTGCTTCTTGTAAGCGGGTAAATCCACAATCAC<br>CACCAC                       | <i>LLO_2491</i> knockout up-R                 |
| pYS1047 | GTGGTGGTGATTGTGGATTTACCCGCTTACAAGA<br>AGCAGA                       | <i>LLO_2491</i> knockout down-F               |
| pYS1048 | CGC <u>GGATCCA</u> AAAAGTTCCTTAAGTCAATG                            | <i>LLO_2491</i> knockout down<br>BamHI-R      |
| pYS1049 | ACGCG <u>TCGACG</u> CTTTAATAAATCCCTCAAG                            | <i>LLO_3391</i> knockout up Sall-F            |
| pYS1050 | TTCTGTTTCAGCATTAGTGTCTTTTTCTTAGAACCC<br>TTCGT                      | <i>LLO_3391</i> knockout up-R                 |
| pYS1051 | ACGAAGGTTCTAAGGAAAAAGACACTAATGCTG<br>AACAGAA                       | <i>LLO_3391</i> knockout down-F               |
| pYS1052 | CGC <u>GGATCCT</u> CTGTCTCTGTTTTCATCCA                             | <i>LLO_3391</i> knockout down<br>BamHI-R      |
| pYS1053 | AAGAAATACTATACGCATAATACATAGCATTGCCT<br>TTACCACTATTATCCACTTG        | <i>LLO_2238</i> <sub>C12A-1</sub>             |
| pYS1054 | CAAGTGGATAATAGTGGTAAAGGCAATGCTATGT<br>ATTATGCGTATAGTATTTCTT        | <i>LLO_2238</i> <sub>C12A-2</sub>             |
| pYS1055 | AGTAAATAAAGTGCATAGTTATGAAAAAAGCATT<br>ATCAAAACTTCCAGAAACATCAACTGC  | <i>LLO_1014</i> <sub>C26A-1</sub>             |
| pYS1056 | GCAGTTGATGTTTCTGGAAGTTTTGATAATGCTT<br>TTTTTCATAACTATGCACTTTATTTACT | <i>LLO_1014</i> <sub>C26A-2</sub>             |
| pYS1057 | GCAACCCAATACCCAGCTAATCCTCTATTTAATCC<br>TTTGGCATTTCG                | <i>LLO_3391</i> <sub>C1124A-1</sub>           |
| pYS1058 | CGAATGCCAAAGGATTAATAGAGGATTAGCTGG<br>GTATTGGGTTGC                  | <i>LLO_3391</i> <sub>C1124A-2</sub>           |

<sup>a</sup> Restriction enzyme sites are underlined.

## REFERENCES

1. Berger KH, Isberg RR. 1993. Two distinct defects in intracellular growth complemented by a single genetic locus in *Legionella pneumophila*. *Mol Microbiol* 7:7-19 <https://doi.org/10.1111/j.1365-2958.1993.tb01092.x>.
2. Liu Y, Luo ZQ. 2007. The *Legionella pneumophila* effector SidJ is required for efficient recruitment of endoplasmic reticulum proteins to the bacterial phagosome. *Infect Immun* 75:592-603 <https://doi.org/10.1128/iai.01278-06>.
3. Ma K, Zhen X, Zhou B, Gan N, Cao Y, Fan C, Ouyang S, Luo ZQ, Qiu J. 2020. The bacterial deubiquitinase Ceg23 regulates the association of Lys-63-linked polyubiquitin molecules on the *Legionella* phagosome. *J Biol Chem* 295:1646-1657 <https://doi.org/10.1074/jbc.RA119.011758>.
4. Liu S, Luo J, Zhen X, Qiu J, Ouyang S, Luo ZQ. 2020. Interplay between bacterial deubiquitinase and ubiquitin E3 ligase regulates ubiquitin dynamics on *Legionella* phagosomes. *Elife* 9:e58114 <https://doi.org/10.7554/eLife.58114>.
5. Duménil G, Isberg RR. 2001. The *Legionella pneumophila* IcmR protein exhibits chaperone activity for IcmQ by preventing its participation in high-molecular-weight complexes. *Mol Microbiol* 40:1113-27 <https://doi.org/10.1046/j.1365-2958.2001.02454.x>.
6. Qiu J, Sheedlo MJ, Yu K, Tan Y, Nakayasu ES, Das C, Liu X, Luo ZQ. 2016. Ubiquitination independent of E1 and E2 enzymes by bacterial effectors. *Nature* 533:120-4 <https://doi.org/10.1038/nature17657>.
7. Xu L, Shen X, Bryan A, Banga S, Swanson MS, Luo ZQ. 2010. Inhibition of host vacuolar H<sup>+</sup>-ATPase activity by a *Legionella pneumophila* effector. *PLoS*

*Pathog* 6:e1000822 <https://doi.org/10.1371/journal.ppat.1000822>.

8. Zhu W, Banga S, Tan Y, Zheng C, Stephenson R, Gately J, Luo ZQ. 2011. Comprehensive identification of protein substrates of the Dot/Icm type IV transporter of *Legionella pneumophila*. *PLoS One* 6:e17638 <https://doi.org/10.1371/journal.pone.0017638>.
